# Supplementary material for: Synergistic bactericidal effects of combined sterilization strategies against Listeria monocytogenes: Mechanistic insights and practical validation in prepared salad
Source: Research Square preprint supplement (doi:10.21203/rs.3.rs-7258284/v1), 2025-08-11
Supplement: Supplementary file 1 [file 020f6dd6384aca89735bb798.docx]

**S****ynergistic antimicrobial effect of combined sterilization strategies against *Listeria monocytogenes*: Mechanistic insights and practical validation in** **prepared salad**

Jinyuan Wei1,2,§, Mohamedelfatieh Ismael1,§, Mingxin Huang1, Tian Han1, Qingping Zhong1,*

1Guangdong Provincial Key Laboratory of Food Quality and Safety, College of Food Science, South China Agricultural University, Guangzhou 510642, China

2Guangdong Province Key Laboratory of Microbial Signals and Disease Control, College of Plant Protection, South China Agricultural University, Guangzhou 510642, China

*Corresponding author: Qingping Zhong

Mailing address: College of Food Science, South China Agricultural University, 510642, Guangzhou, China

Tel: +86-13535121218, +86-20-85288292

E-mail: [zhongqp@scau.edu.cn](mailto:zhongqp@scau.edu.cn)

§These authors have contributed equally to this work.

**Contents**

**Figure S1-S3, Table S1 and S2:**

Interpretation of PMA-qPCR method development

**Figure S4-5:**

Supplementary data related to electronic nose experiments


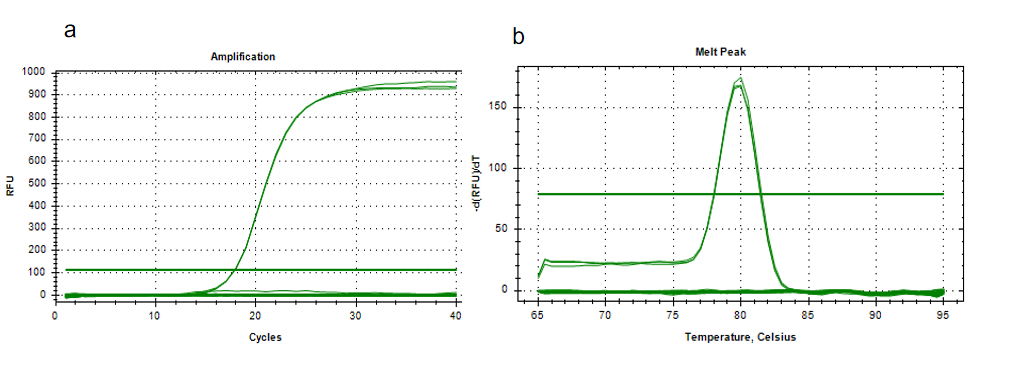


**Supplementary Figure 1.** Specificity of the *hlyA* - based qPCR assay.

(a) Amplification curves showing positive detection in *Listeria monocytogenes* reference strains and no amplification in 11 non-target strains (negative control) (Supplementary Table 2). (b) Characteristic melting peak of *L. monocytogenes* at Tm ≈80°C. Results confirm high specificity of the assay and reliability of primer design.


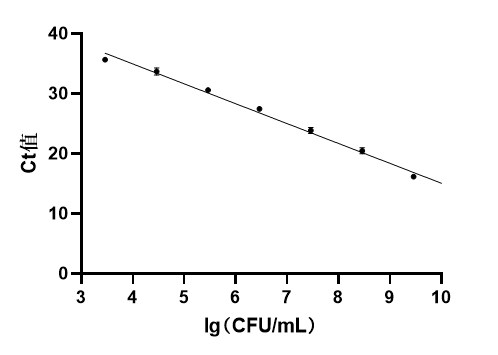


**Supplementary Figure 2.** *Listeria monocytogenes* qPCR standard curve. Bacterial concentrations by plate counting exhibit a strong linear relationship with Ct values. Curve equation: y = -3.314x + 48.21 (R² = 0.992). Effective range: 1.2×10³–1.2×10⁹ CFU/mL. Enables detection of VBNC-state bacteria when combined with plate counting.


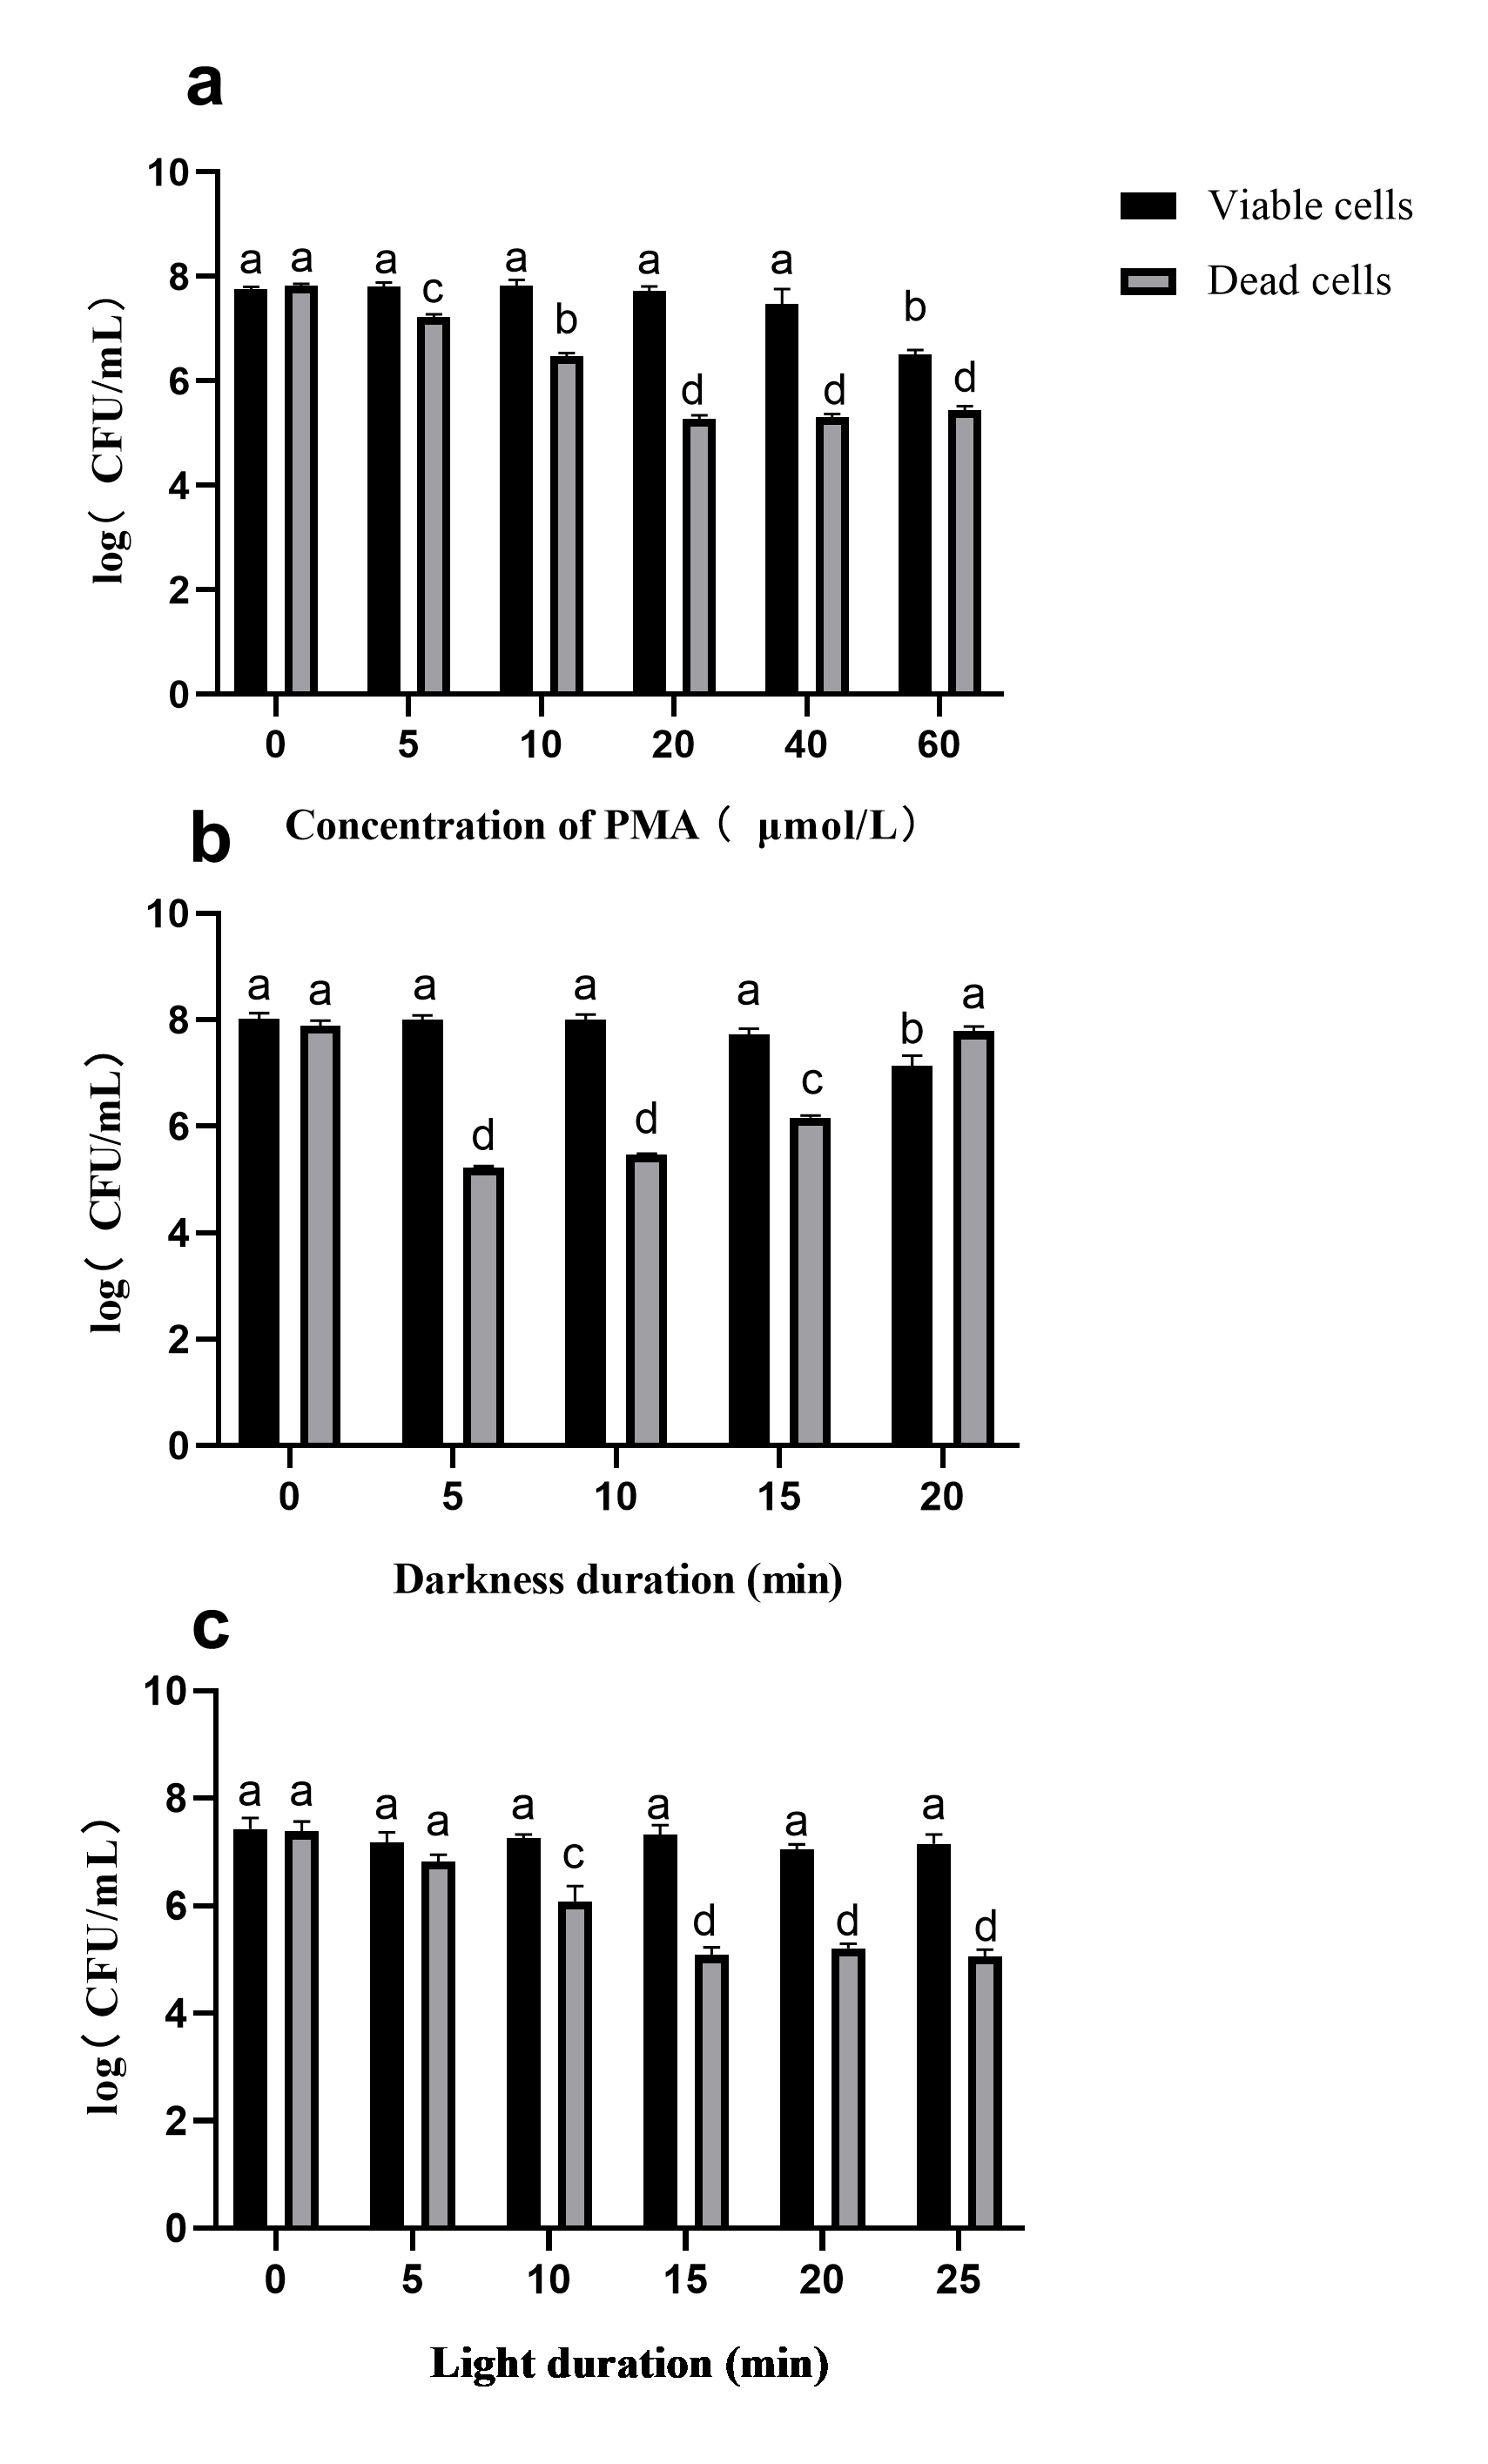


**Supplementary Figure 3.** Effects of PMA treatment conditions on detection of viable *Listeria monocytogenes*. (a) PMA concentration (μM), (b) dark incubation time (min), (c) light exposure time (min)

| Live Ratio | | PMA-qPCR | qPCR | Theoretical Live Count | Detected Live Count |
| --- | --- | --- | --- | --- | --- |
| log(CFU/mL) | log(CFU/mL) | log(CFU/mL) | log(CFU/mL) |
| 1 | - | 8.33±0.10 | 8.47 | 8.47 | 8.33 |
| - | 1 | 3.28±0.09 | 7.02 | - | 3.28 |
| 100 | 1 | 8.23±0.08 | 8.34 | 8.33 | 8.23 |
| 10 | 1 | 8.30±0.09 | 8.28 | 8.24 | 8.30 |
| 1 | 1 | 8.23±0.12 | 8.37 | 8.07 | 8.23 |
| 1 | 10 | 7.27±0.10 | 8.14 | 7.10 | 7.27 |

**Supplementary Table 1.** Detection results of qPCR and PMA-qPCR for mixed suspensions of viable and dead bacteria. Quantitative detection of *Listeria monocytogenes* in mixed viable/dead bacterial suspensions. PMA-qPCR data represent viable counts (CFU/mL), while qPCR data indicate total bacterial loads (CFU/mL). Theoretical viable counts were calculated from total counts based on mixing ratios; detected viable counts are PMA-qPCR means. No significant difference between theoretical and detected values (p > 0.05, t-test) confirms PMA-qPCR's validity for viable-cell quantification.

| Scientific Name (Latin) | Number |
| --- | --- |
| *Listeria monocytogenes* | ATCC-19115 |
| *Listeria seeligeri* | ATCC-35967 |
| *Listeriaivanovii* | ATCC-19119 |
| *Listeria innocua* | ATCC-33090 |
| *Enterococcus faecium* | ATCC-29212 |
| *Staphylococcus epidermidis* | CGMCC-26069 |
| *Staphylococcus aureus* | ATCC-25923 |
| *Salmonella typhimurium* | ATCC-14028 |
| *Escherichia coli* | ATCC-25922 |
| *Shigella flexneri* | ATCC-12022 |
| *Vibrio parahaemolyticus* | ATCC-17802 |
| *[Enterobacter aerogenes](http://dict.youdao.com/w/enterobacter aerogenes/" \l "keyfrom=E2Ctranslation)* | ATCC-13048 |
| *Pseudomonas aeruginosa* | ATCC-9027 |

**Supplementary Table 2.** 11 non-target strains. ATCC: American type culture collection, CGMCC: China General Microbiological Culture Collection Center.


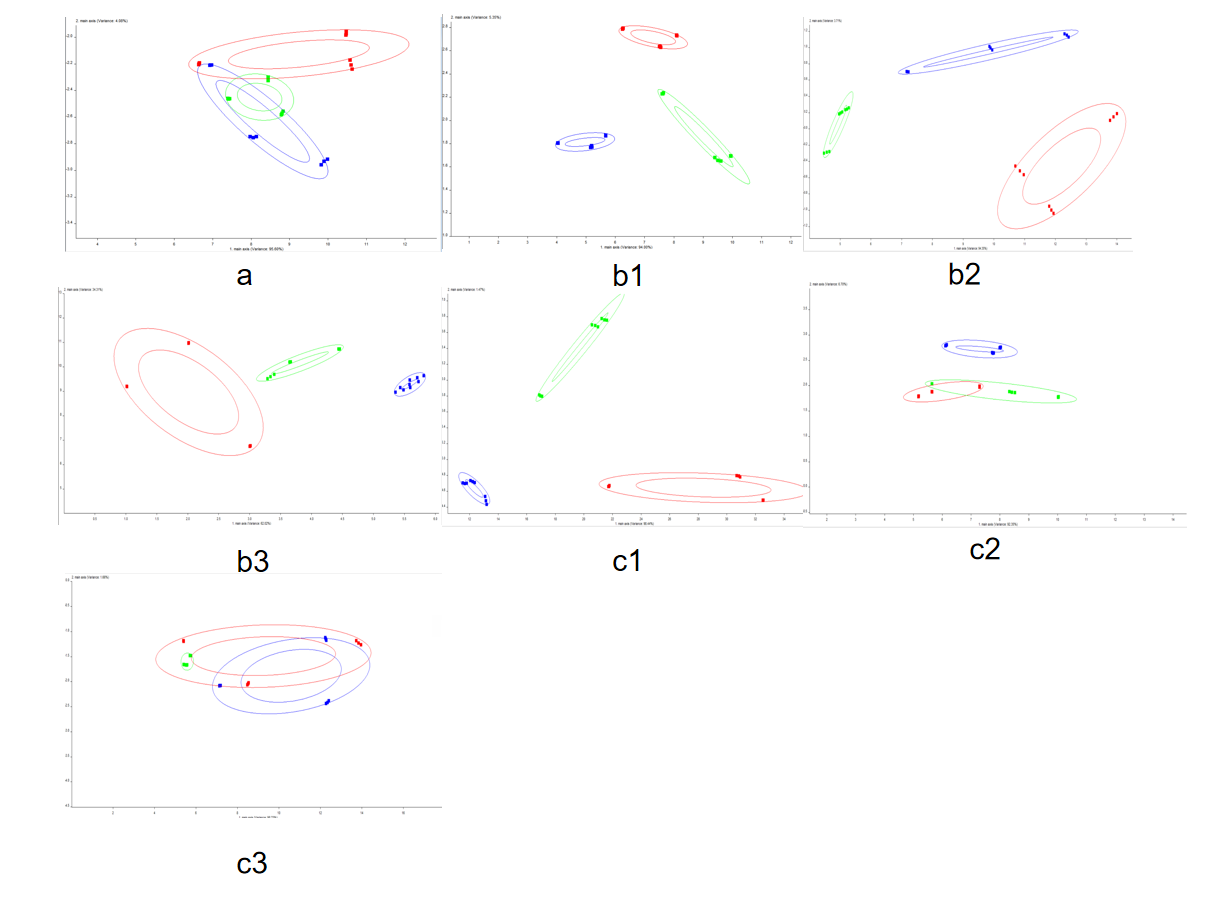


**Supplementary Figure 5. PCA of electronic nose analysis.**

a-day 0, b-stored at 4 ℃, c-stored at 10 ℃. 1-3 represented 3rd, 6th and 9th days of storage period. Green was the control group, red was 4 MIC SAEW, and blue was the combined sterilization method US+1 MIC SAEW+1 MIC SAEW


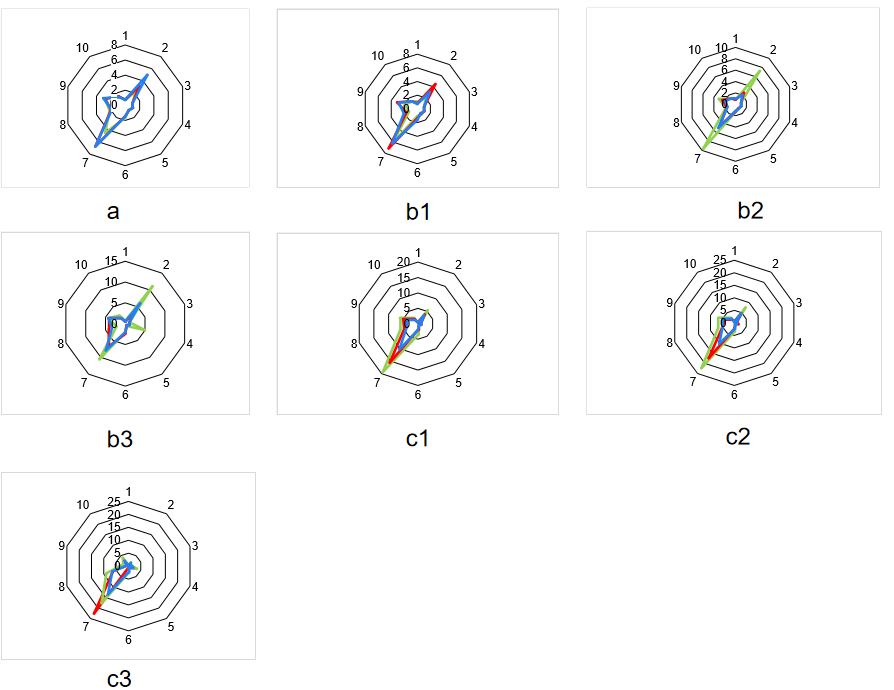


**Supplementary Figure 6. Radar chart of electronic nose analysis of premade salad after treatment with different sterilization methods.**

a-day 0, b-stored at 4 ℃, c-stored at 10 ℃. 1-3 represented 3rd, 6th and 9th days of storage period. Green was the control group, red was 4 MIC SAEW, and blue was the combined sterilization method US+1 MIC SAEW+1 MIC SAEW.
